# Supplementary material
Source: MDPI journal article supplement (https://www.mdpi.com/2079-9284/8/1/4)
Supplement: s1 [file s1]

## SUPPLEMENTARY INFORMATION

### Comparative Study of Curcumin and its Hydrogenated Metabolites, Tetrahydrocurcumin, Hexahydrocurcumin and Octahydrocurcumin on Melanogenesis in B16F10 and MNT-1 Cells

Shilpi Goenka<sup>1,\*</sup> and Sanford R. Simon<sup>1,2,3\*</sup>

<sup>1</sup> Department of Biomedical Engineering, Stony Brook University, Stony Brook, NY 11794-5281, USA

<sup>2</sup> Department of Biochemistry and Cellular Biology, Stony Brook University, Stony Brook, NY 11794-5281, USA

<sup>3</sup> Department of Pathology, Stony Brook University, Stony Brook, NY, USA.

\*Correspondence

Shilpi Goenka

Department of Biomedical Engineering

Stony Brook University, Stony Brook, NY 11794-5281.

Email: [shilpi.goenka@stonybrook.edu](mailto:shilpi.goenka@stonybrook.edu)

#### Supplementary Methods:

##### 1. Calculation of Cell viability from Alamar Blue assay.

The data from Alamar Blue assay was used for calculation of cellular viability based on manufacturer's instructions where the % of Alamar Blue reduction between sample and control group was calculated as:  $(S/C) \times 100$ , where

$S = [(\epsilon_{OX})_{\lambda 2} \times (A_{\lambda 1}) - ((\epsilon_{OX})_{\lambda 1}) \times (A_{\lambda 2})]$  of sample, and  $C = [(\epsilon_{OX})_{\lambda 2} \times (A'_{\lambda 1}) - ((\epsilon_{OX})_{\lambda 1}) \times (A'_{\lambda 2})]$  of control.

In the above equation,  $\lambda 1$  is wavelength at 570 nm,  $\lambda 2$  is wavelength at 600 nm,  $(\epsilon_{OX})_{\lambda 1}$  is the molar extinction coefficient of oxidized Alamar Blue at 570nm (80,586),  $(\epsilon_{OX})_{\lambda 2}$  is the molar extinction coefficient of oxidized Alamar Blue at 600 nm (117,216),  $A$  is the absorbance of sample and  $A'$  is the absorbance of control.

##### 2. Cytotoxicity of PC to MNT-1 Cells.

MNT-1 cells were cultured in a 96-well plate at a seeding density of  $1 \times 10^4$  cells/well and test compound PC at concentration range (5- 40  $\mu$ M) was added the next day, and cells were cultured for a period of 5 d, with the compound replenished on third day of culture. At the end of treatments, the viability was measured by Alamar Blue assay and calculations were based on the aforementioned equation.

##### 3. Cytotoxicity of PC after L-Cysteine co-treatment in B16F10 Cells.

B16F10 cells were cultured in a 96-well plate at a seeding density of  $0.5 \times 10^4$  cells/well and the next day, PC (10  $\mu$ M) in the absence or presence of L-Cysteine solution (diluted from 0.3 M solution in DPBS) was added and cells were cultured for 3 d. At the end of treatments, the viability was measured by Alamar Blue assay.

# Supplementary Figures:

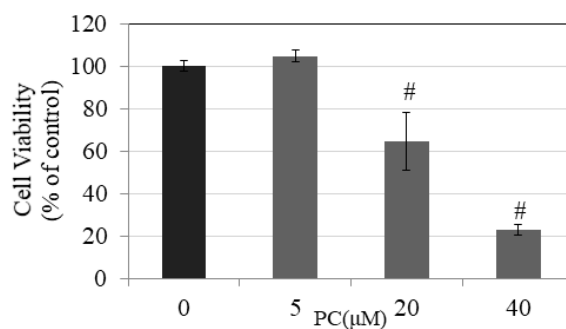

**Figure S1:** Viability of MNT-1 human melanoma cells treated with PC at various concentrations (5- 40  $\mu$ M) for duration of 5 d tested by Alamar Blue assay; <sup>#</sup>  $p < 0.001$  vs. control; One-way ANOVA with Dunnett's test; Data is mean  $\pm$  SD of triplicate determinations.

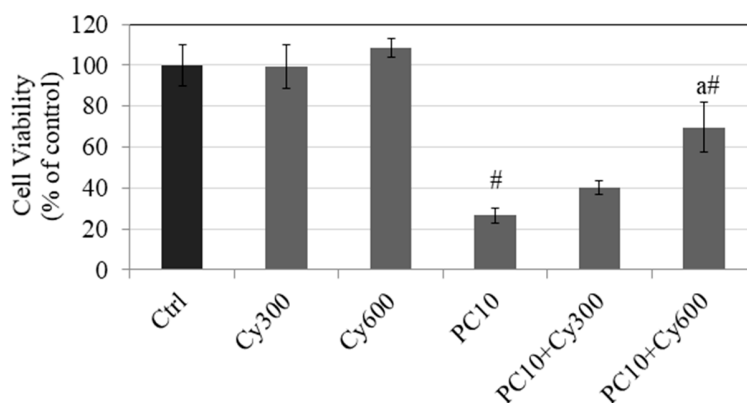

**Figure S2:** Viability of B16F10 mouse melanoma cells treated with PC (10  $\mu$ M) in presence or absence of L-Cysteine (Cy) for duration of 3 d tested by Alamar Blue assay. Co-addition of L-cysteine (Cy) restores cytotoxicity of PC indicating a role of the Michael reaction acceptor on the  $\beta$ -diketone bond; PC10 indicates PC at 10  $\mu$ M; L-Cysteine (Cy) at 300  $\mu$ M and 600  $\mu$ M was added; (<sup>#</sup>  $p < 0.001$  vs. Ctrl; letter a-  $p < 0.001$  vs. PC10; One-way ANOVA with Tukey's test); Data is mean  $\pm$  SD of triplicate determinations.

**Table S1:** Summary of the effects of THC, HHC and OHC on melanogenesis in both melanoma cells

| Cell Model                  | THC                                                                     | HHC                                                                     | OHC                                                                     |
|-----------------------------|-------------------------------------------------------------------------|-------------------------------------------------------------------------|-------------------------------------------------------------------------|
| B16F10 mouse melanoma cells | ↑ Melanin synthesis<br>✱Cellular tyrosinase activity and protein levels | ✱ Melanin synthesis<br>✱Cellular tyrosinase activity and protein levels | ↑ Melanin synthesis<br>✱Cellular tyrosinase activity and protein levels |
| MNT-1 human melanoma cells  | ↑ Melanin synthesis<br>✱Cellular tyrosinase activity and protein levels | ↑ Melanin synthesis<br>✱Cellular tyrosinase activity and protein levels | ✱ Melanin synthesis<br>✱Cellular tyrosinase activity and protein levels |

The cross symbol denotes no effect, the arrow denotes a higher increase in melanin synthesis and smaller arrow shows moderate increase in melanin synthesis
